# Supplementary material
Source: PubMed Central journal article supplement (PMC4353013)
Supplement: ja503328a_si_001.pdf [file ja503328a_si_001.pdf]

Supporting Information for

## **Differential Control of Heme Reactivity in Alpha and Beta Subunits of Hemoglobin: A Combined Raman Spectroscopic and Computational Study**

Eric M. Jones,<sup>†,‡,#</sup> Emanuele Monza,<sup>§,#</sup> Gurusamy Balakrishnan,<sup>†</sup> George C. Blouin,<sup>†</sup> Piotr J. Mak,<sup>||</sup> Qianhong Zhu,<sup>||</sup> James R. Kincaid,<sup>||</sup> Victor Guallar,<sup>§,¶,\*</sup> and Thomas G. Spiro<sup>†,\*</sup>

<sup>†</sup> Department of Chemistry, University of Washington, Box 351700, Seattle, Washington 98195-1700, United States

<sup>§</sup> Joint BSC-IRB Research Program in Computational Biology. Barcelona, Spain  
Supercomputing Center, c/ Jordi Girona 29, 08034 Barcelona, Spain

<sup>||</sup> Department of Chemistry, Marquette University, Milwaukee, Wisconsin 53233, United States

<sup>¶</sup> Institució Catalana de Recerca i Estudis Avançats (ICREA), Passeig Lluís Companys 23, 08010 Barcelona, Spain

<sup>#</sup> Contributed equally to this work.

<sup>‡</sup> Current address: Department of Chemistry and Biochemistry, California Polytechnic State University, San Luis Obispo, CA 93407

### **\* Corresponding Authors**

Thomas Spiro <spiro@chem.washington.edu>

Victor Guallar <victor.guallar@bsc.es>

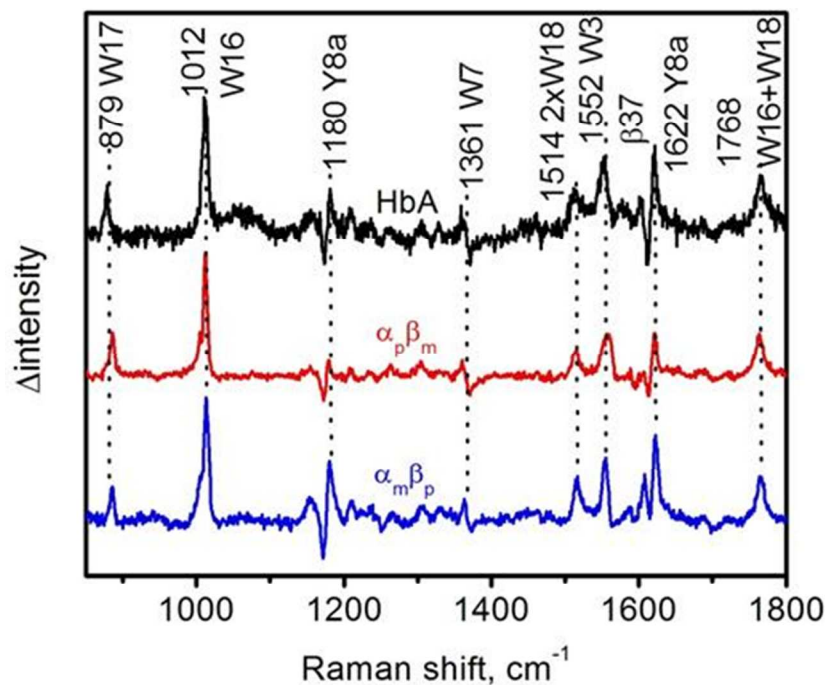

Figure S1. 229 nm-excited UVrR difference spectra between deoxyHb and HbCO (T - R) for HbA and for hybrid Hbs with mesoheme replacing protoheme in the  $\alpha$  or  $\beta$  chains. Assignments are indicated for bands arising from tryptophan (W) and tyrosine (Y).<sup>1</sup> The difference signals are associated with inter-dimer H-bonds involving Trp $\beta$ 37 and Tyr $\alpha$ 49, which are present in the T state but not in the R state.

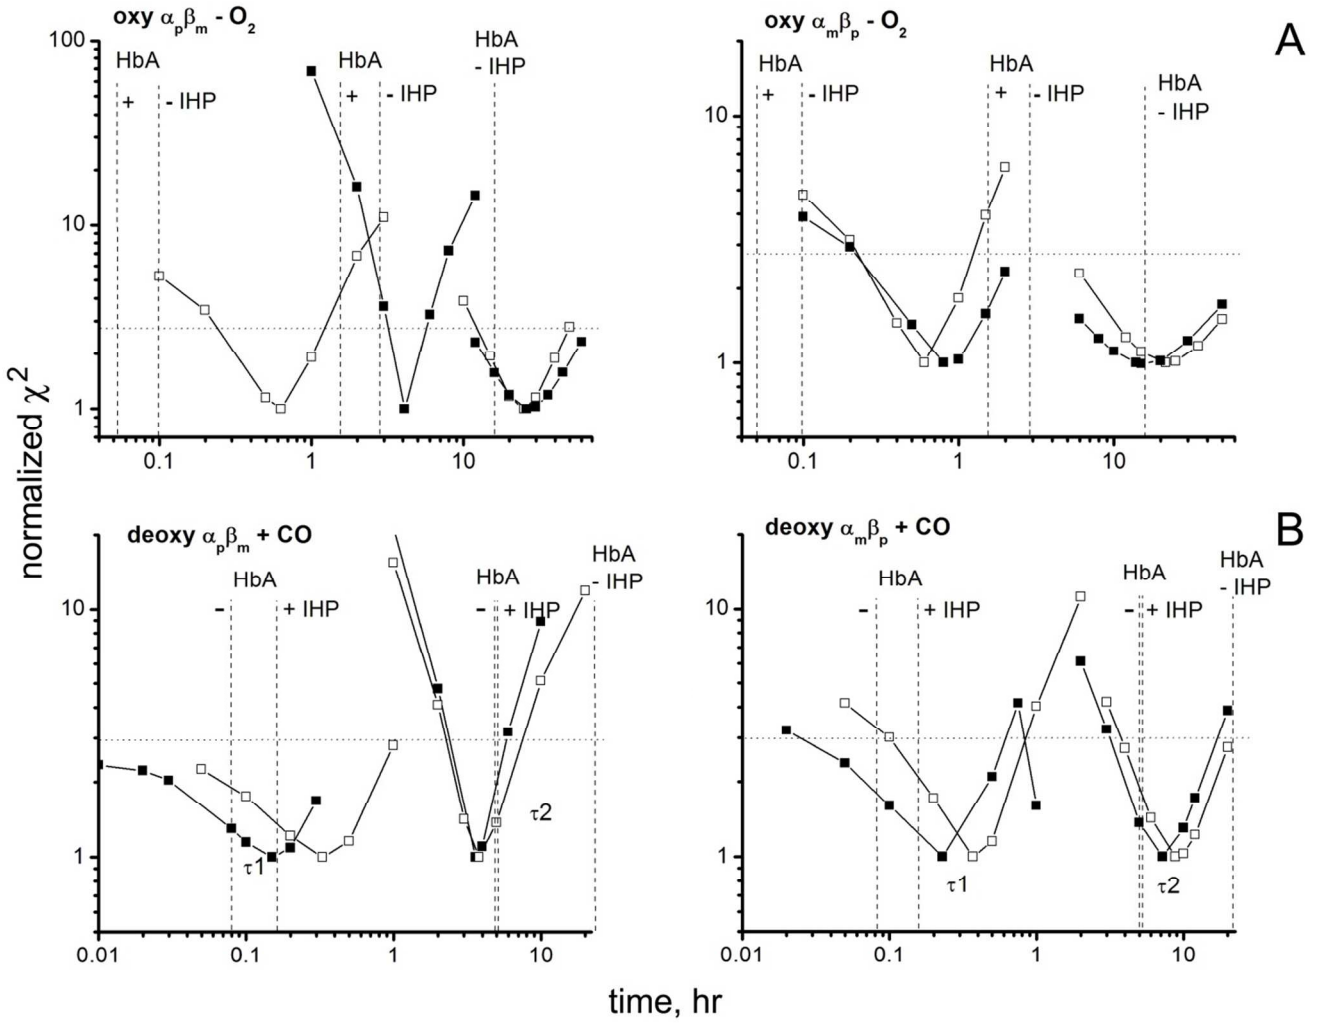

Figure S2: Error surfaces for time constants of tertiary conversion (Table 1, main text) for (A) oxyHb hybrids minus  $O_2$  (R to T conversion), and (B) deoxyHb hybrids plus CO (T to R conversion), for  $\alpha_p\beta_m$  Hb (left column) and  $\alpha_m\beta_p$  Hb (right column). Points indicate normalized  $\chi^2$  values for least-squares fits of a double exponential to the data of (A) Figure 3 or (B) Figure 5 in the main text, with the indicated time constant fixed and other parameters allowed to vary. In all panels, filled symbols are samples without IHP and open symbols are samples with IHP. Vertical dotted lines are the corresponding time constants for HbA, taken from our previous study.<sup>2</sup> Horizontal dotted lines are the F-statistic for  $p = 0.05$  for each dataset.

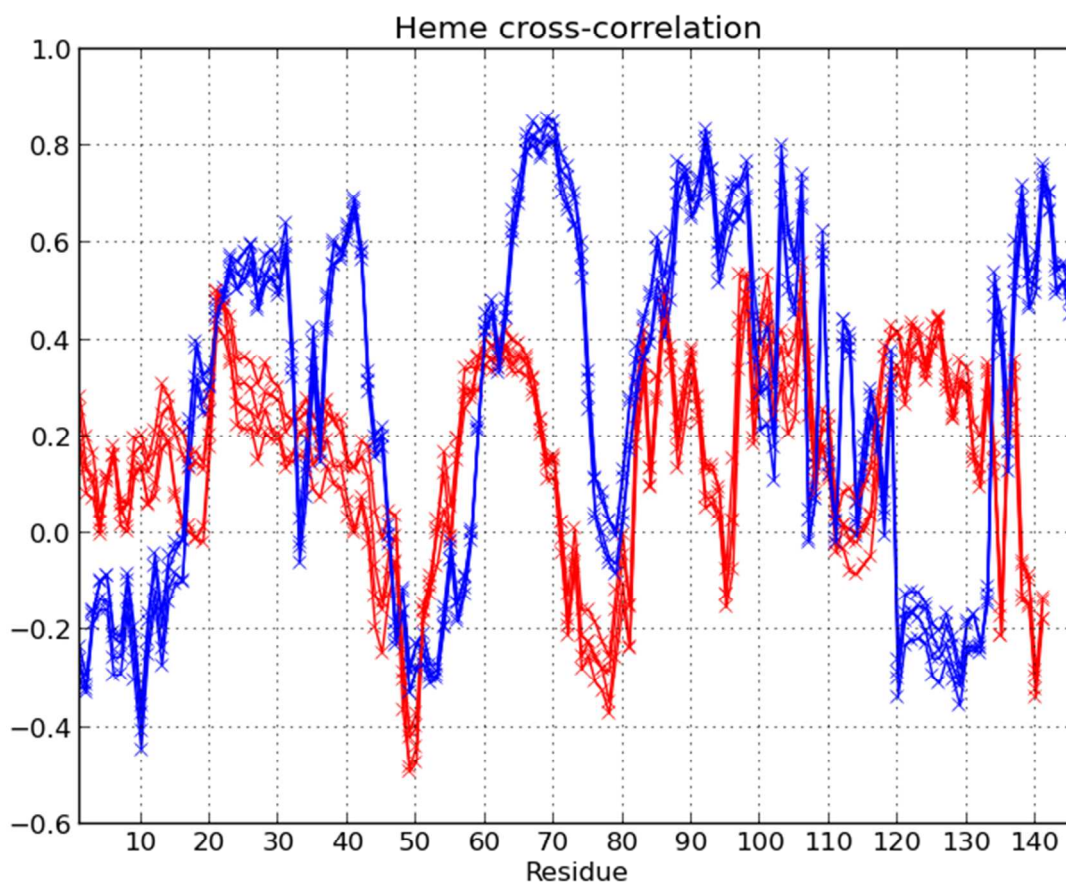

Figure S3. Cross correlation of average heme pyrrole N atom displacements along the PELE trajectory with the C $\alpha$  displacements in the  $\alpha$  (red) and  $\beta$  (blue) chains.

## References

- (1) Hu, X. H.; Spiro, T. G. *Biochemistry* **1997**, *36*, 15701.
- (2) Jones, E. M.; Balakrishnan, G.; Spiro, T. G. *J Am Chem Soc* **2012**, *134*, 3461.
